# Supplementary material for: Dextran-based redox-responsive doxorubicin prodrug micelles for overcoming multidrug resistance
Source: Royal Society of Chemistry journal article supplement (doi:10.1039/c3py00830d), 2013-01-01
Supplement: c3py00830d.pdf [file c3py00830d.pdf]

## Electronic Supplementary Information

### Acid-base titration

The buffer capability of DEX-PEI and DEX-PEI(-SS-DOX)<sub>2</sub> were determined by acid-base titration assay over the pH of 10~3. 0.5 mg/mL of each sample solution was prepared and were first titrated by 0.1 M NaOH to a pH of 10. Then different volume of 0.1 M HCl was added to the solution, and the pH value was measured using a pH meter.

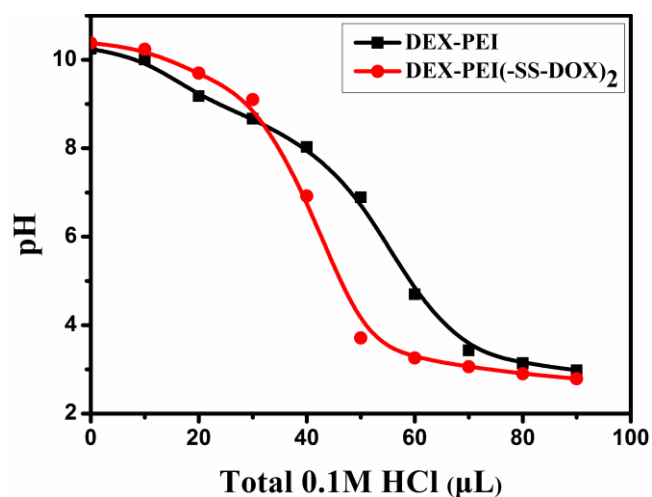

Fig. S1 Acid-base titration profiles of DEX-PEI and DEX-PEI(-SS-DOX)<sub>2</sub>.
